# Supplementary material
Source: HighWire-hosted journal article supplement (https://hw-f5-jim.highwire.org/content/jim-2022-002344)
Supplement: inline-supplementary-material-1 [file inline-supplementary-material-1.pdf]

**Supplementary Table S1. Characteristics of COVID-19 Patients Readmitted to Eight Metropolitan Atlanta Hospitals (March 2020 – December 2020)\***

|                                      | Full population<br>(n = 7,155), n<br>(%) | Non-readmitted<br>(n = 6,692), n<br>(%) | Readmitted<br>(n = 463), n<br>(%) | P-value |
|--------------------------------------|------------------------------------------|-----------------------------------------|-----------------------------------|---------|
| <b>Age group, yrs</b>                |                                          |                                         |                                   |         |
| <45                                  | 1476 (20.6)                              | 1390 (20.8)                             | 86 (18.6)                         | 0.26    |
| 45–64                                | 2834 (39.6)                              | 2660 (39.7)                             | 174 (37.6)                        | 0.36    |
| 65–79                                | 2000 (28.0)                              | 1865 (27.9)                             | 135 (29.2)                        | 0.55    |
| ≥80                                  | 845 (11.8)                               | 777 (11.6)                              | 68 (14.7)                         | 0.04    |
| <b>Sex</b>                           |                                          |                                         |                                   |         |
| Women                                | 3382 (47.3)                              | 3170 (47.4)                             | 212 (45.8)                        | 0.51    |
| Men                                  | 3772 (52.7)                              | 3521 (52.6)                             | 251 (54.2)                        | 0.50    |
| <b>Race/ethnicity</b>                |                                          |                                         |                                   |         |
| White (Non-Hispanic)                 | 1337 (18.7)                              | 1241 (18.5)                             | 96 (20.7)                         | 0.24    |
| Black (Non-Hispanic)                 | 4335 (60.6)                              | 4046 (60.5)                             | 289 (62.4)                        | 0.40    |
| Hispanic                             | 514 (7.2)                                | 485 (7.2)                               | 29 (6.3)                          | 0.43    |
| Asian                                | 223 (3.1)                                | 210 (3.1)                               | 13 (2.8)                          | 0.69    |
| Unknown/other                        | 746 (10.4)                               | 710 (10.6)                              | 36 (7.8)                          | 0.05    |
| <b>Insurance Status</b>              |                                          |                                         |                                   |         |
| Private Insurance (including Kaiser) | 3554 (49.7)                              | 3367 (50.3)                             | 187 (40.4)                        | <0.001  |
| Medicare                             | 2280 (31.9)                              | 2103 (31.4)                             | 177 (38.2)                        | 0.002   |
| Medicaid                             | 684 (9.6)                                | 627 (9.4)                               | 57 (12.3)                         | 0.04    |
| Veterans Administration              | 403 (5.6)                                | 376 (5.6)                               | 27 (5.8)                          | 0.85    |
| Uninsured                            | 234 (3.3)                                | 219 (3.3)                               | 15 (3.2)                          | 0.97    |
| <b>Comorbidities</b>                 |                                          |                                         |                                   |         |
| Obesity                              | 3445 (49.3)                              | 3253 (49.7)                             | 192 (42.8)                        | 0.004   |
| Hypertension                         | 4588 (64.1)                              | 4244 (63.4)                             | 344 (74.3)                        | <0.001  |
| Diabetes                             | 2738 (38.3)                              | 2533 (37.9)                             | 205 (44.3)                        | 0.006   |
| Hyperlipidemia                       | 2461 (34.4)                              | 2276 (34.0)                             | 185 (40.0)                        | 0.009   |
| Chronic lung disease                 | 861 (12.0)                               | 793 (11.8)                              | 68 (14.7)                         | 0.07    |
| Chronic kidney disease               |                                          |                                         |                                   |         |
| Stage 3 and 4                        | 992 (13.9)                               | 884 (13.2)                              | 108 (23.3)                        | <0.001  |
| Stage 5 and ESRD                     | 450 (6.7)                                | 385 (6.1)                               | 65 (14.9)                         | <0.001  |
| Chronic congestive heart failure     | 1364 (19.1)                              | 1220 (18.2)                             | 144 (31.1)                        | <0.001  |
| Other cardiovascular disease         | 2096 (31.0)                              | 1910 (30.2)                             | 186 (42.7)                        | <0.001  |
| Mental health condition†             | 1362 (19.0)                              | 1258 (18.8)                             | 104 (22.5)                        | 0.05    |
| Cancer                               | 509 (7.1)                                | 458 (6.8)                               | 51 (11.0)                         | 0.001   |
| HIV                                  | 141 (2.0)                                | 133 (2.0)                               | 8 (1.7)                           | 0.70    |
| Charlson Comorbidity Index (CCI)‡    |                                          |                                         |                                   |         |
| 0 (low risk)                         | 1803 (31.4)                              | 1738 (32.4)                             | 65 (17.5)                         | <0.001  |
| 1–3 (medium risk)                    | 3343 (58.2)                              | 3104 (57.8)                             | 239 (64.4)                        | 0.03    |
| ≥4 (high risk)                       | 597 (10.4)                               | 530 (9.9)                               | 67 (18.1)                         | <0.001  |
| <b>Index Admission Treatment</b>     |                                          |                                         |                                   |         |
| Remdesivir                           | 1832 (32.4)                              | 1729 (33.3)                             | 103 (22.2)                        | <0.001  |

|                                       |             |             |            |        |
|---------------------------------------|-------------|-------------|------------|--------|
| Dexamethasone                         | 2943 (52.1) | 2710 (52.2) | 233 (50.3) | 0.43   |
| Remdesivir and dexamethasone          | 1559 (24.6) | 1485 (23.5) | 88 (20.2)  | 0.11   |
| Required intensive unit care          | 1763 (24.6) | 1485 (23.5) | 91 (19.7)  | 0.01   |
| Required mechanical ventilation       | 803 (14.2)  | 768 (14.8)  | 35 (7.6)   | <0.001 |
| <b>Index Admission Length of Stay</b> |             |             |            |        |
| ≤7 days                               | 4438 (65.7) | 4158 (65.8) | 280 (64.2) | 0.48   |
| 8–14 days                             | 1174 (17.4) | 1089 (17.2) | 85 (19.5)  | 0.24   |
| >14 days                              | 1140 (16.9) | 1069 (16.9) | 71 (16.3)  | 0.72   |
| <b>Index Admission Disposition</b>    |             |             |            |        |
| Home (self-care)                      | 4041 (59.8) | 3787 (60.0) | 254 (58.3) | 0.47   |
| Home (with home health services)      | 753 (11.2)  | 664 (10.5)  | 89 (20.4)  | <0.001 |
| Long Term Acute Care Hospital         | 94 (1.4)    | 90 (1.4)    | 4 (0.9)    | 0.38   |
| Skilled Nursing Facility              | 639 (9.5)   | 577 (9.1)   | 62 (14.2)  | 0.001  |
| Hospice (home or inpatient)           | 205 (3.0)   | 199 (3.2)   | 6 (1.4)    | 0.04   |
| Transferred to another hospital       | 286 (4.2)   | 277 (4.4)   | 9 (2.1)    | 0.02   |
| Other ¶                               | 189 (2.8)   | 177 (2.8)   | 12 (2.8)   | 0.95   |

\* Data from all 8 hospitals, including 6 members of an academic health system, 1 academic safety-net hospital, and 1 VA Medical Center.

† Mental health condition includes depression, anxiety, bipolar and schizophrenia.

‡ Charlson Comorbidity Index was not available for the academic safety-net hospital

¶ Other was the combination of other rehab, left against medical advice or discontinued care and other discharge dispositions not included above.

§ Length of Stay (of Index admission) was not available for VA Medical Center data.

|| P value for readmitted population only

**Supplementary Table S2. Factors Associated with COVID-19 Readmission (in Multivariable Regression) to Eight Metropolitan Atlanta Hospitals, March-December 2020**

|                                      | No. of readmitted cases, n = 463 | Odds Ratio (95% CI) § |               |
|--------------------------------------|----------------------------------|-----------------------|---------------|
|                                      |                                  | Unadjusted            | Adjusted      |
| <b>Age group, yrs</b>                |                                  |                       |               |
| <45                                  | 86                               | 1.0 (Ref)             | 1.0 (Ref)     |
| 45–64                                | 174                              | 1.1 (0.8,1.4)         | 0.8 (0.6,1.1) |
| 65–79                                | 135                              | 1.2 (0.9,1.5)         | 0.8 (0.5,1.1) |
| ≥80                                  | 68                               | 1.4 (1.0,2.0)         | 0.8 (0.5,1.2) |
| <b>Sex</b>                           |                                  |                       |               |
| Women                                | 212                              | 1.0 (Ref)             | 1.0 (Ref)     |
| Men                                  | 251                              | 1.1(0.9,1.3)          | 1.0 (0.8,1.3) |
| <b>Race/ethnicity</b>                |                                  |                       |               |
| White (Non-Hispanic)                 | 96                               | 1.0 (Ref)             | 1.0 (Ref)     |
| Black (Non-Hispanic)                 | 289                              | 0.9 (0.7,1.2)         | 0.9 (0.7,1.1) |
| Hispanic                             | 29                               | 0.8 (0.5,1.2)         | 0.8 (0.5,1.3) |
| Asian                                | 13                               | 0.8 (0.4,1.5)         | 0.9 (0.5,1.6) |
| Unknown/other                        | 36                               | 0.7 (0.4,1.0)         | 0.4 (0.2,0.8) |
| <b>Insurance Status</b>              |                                  |                       |               |
| Private Insurance (including Kaiser) | 187                              | 1.0 (Ref)             | 1.0 (Ref)     |
| Medicare                             | 177                              | 1.5 (1.2,1.9)         | 1.2(0.9,1.5)  |
| Medicaid                             | 57                               | 1.6 (1.2,2.2)         | 1.5 (1.1,2.1) |
| Veterans Administration              | 27                               | 1.3 (0.9,2.0)         | 1.3 (0.8,1.9) |
| Uninsured                            | 15                               | 1.2 (0.7,2.1)         | 1.4 (0.8,2.5) |
| <b>Comorbidities</b>                 |                                  |                       |               |
| Obesity                              | 192                              | 0.8 (0.6,0.9)         | 0.7 (0.6,0.9) |
| Hypertension                         | 344                              | 1.7 (1.3,2.1)         | 1.3 (1.0,1.7) |
| Diabetes                             | 205                              | 1.3 (1.1, 1.6)        | 1.1 (0.9,1.3) |
| Hyperlipidemia                       | 185                              | 1.3 (1.1,1.5)         | 1.0 (0.8,1.2) |
| Chronic lung disease                 | 68                               | 1.4 (1.0,1.7)         | 1.1 (0.8,1.5) |
| Chronic kidney disease Stage 3 and 4 | 108                              | 2.0 (1.6,2.5)         | 1.6 (1.2,2.1) |

|                                     |     |               |                  |
|-------------------------------------|-----|---------------|------------------|
| Stage 5 and ESRD                    | 65  | 2.7 (2.0,3.6) | 2.1<br>(1.6,2.9) |
| Chronic congestive heart failure    | 144 | 2.0 (1.6,2.5) | 1.5<br>(1.2,1.9) |
| Other cardiovascular disease        | 186 | 1.7 (1.4,2.1) | 1.4<br>(1.1,1.7) |
| Mental health condition†            | 104 | 1.3 (1.0,1.6) | 1.3<br>(1.0,1.7) |
| Cancer                              | 51  | 1.7 (1.2,2.3) | 2.0<br>(1.3,2.6) |
| HIV                                 | 8   | 0.9 (0.4,1.8) | 1.1<br>(0.5,2.2) |
| Charlson Comorbidity Index (CCI)‡   |     |               |                  |
| 0 (low risk)                        | 65  | 1.0 (Ref)     | 1.0 (Ref)        |
| 1–3 (medium risk)                   | 239 | 2.1 (1.6,2.7) | 2.1<br>(1.4,3.0) |
| ≥4 (high risk)                      | 67  | 3.4 (2.4,4.8) | 3.3<br>(1.9,5.9) |
| <b>Index Admission Treatment</b>    |     |               |                  |
| Remdesivir                          | 103 | 0.6 (0.5,0.7) | 0.7<br>(0.5,0.9) |
| Dexamethasone                       | 233 | 0.9 (0.8,1.1) | 0.9<br>(0.7,1.1) |
| Remdesivir and dexamethasone        | 94  | 0.8 (0.6,1.0) | 1.0<br>(0.8,1.3) |
| Required intensive care unit        | 91  | 0.7 (0.6,0.9) | 0.6<br>(0.5,0.8) |
| Required mechanical ventilation     | 35  | 0.5 (0.3,0.7) | 0.4<br>(0.3,0.5) |
| Length of Stay (of Index admission) |     |               |                  |
| ≤7 days                             | 280 | 1.0 (Ref)     | 1.0 (Ref)        |
| 8–14 days                           | 85  | 1.2 (0.9,1.5) | 1.0<br>(0.8,1.2) |
| >14 days                            | 71  | 1.0 (0.8,1.3) | 0.8<br>(0.6,1.0) |
| <b>Index Admission Disposition</b>  |     |               |                  |
| Home (self-care)                    | 254 | 1.0 (Ref)     | 1.0 (Ref)        |
| Home (with home health services)    | 89  | 2.0 (1.5,2.6) | 1.5<br>(1.1,2.0) |
| Long Term Acute Care Hospital       | 4   | 0.7 (0.2,1.8) | 0.3<br>(0.1,1.1) |
| Skilled Nursing Facility            | 62  | 1.6 (1.2,2.1) | 1.1<br>(0.8,1.5) |
| Hospice (home or inpatient)         | 6   | 0.4 (0.2,1.0) | 0.3<br>(0.1,0.7) |
| Transferred to another hospital     | 9   | 0.5 (0.2,0.9) | 0.4<br>(0.2,0.8) |
| Other ¶¶                            | 12  | 1.0 (0.6,1.7) | 1.0<br>(0.4,2.4) |

\* Data from all 8 hospitals, including 6 academic health system hospitals, 1 academic safety-net hospital, and 1 VA Medical Center.

† Mental health condition include depression, anxiety, bipolar and schizophrenia.

‡ Charlson Comorbidity Index was not available for the academic safety-net hospital

¶ Other was the combination of other rehab, left against medical advice or discontinued care and other discharge dispositions not included above.

§ Adjusted according to the independent variables in turn for: Age, gender, obese, race/ethnicity, hypertension, diabetes, hyperlipidemia, chronic lung disease, chronic kidney disease, congestive heart failure, mental disease, respectively.

|| Length of Stay (of Index admission) was not available for VA Medical Center data.

**Supplementary Table S3**

| <b>Social Determinant</b>      | <b>OR</b> | <b>Lower CI</b> | <b>Upper CI</b> | <b>P-value</b> |
|--------------------------------|-----------|-----------------|-----------------|----------------|
| % Education Associates Degree  | 0.004     | 0.001           | 0.566           | 0.029          |
| % Never Married                | 2.013     | 0.742           | 5.459           | 0.169          |
| Average Household Size         | 0.665     | 0.481           | 0.92            | 0.014          |
| Housing Affordability Index    | 0.997     | 0.994           | 1               | 0.0253         |
| % Married                      | 0.632     | 0.257           | 1.555           | 0.318          |
| % Renter Occupied Units        | 1.001     | 1.001           | 1.001           | 0.198          |
| Wealth Index                   | 1.001     | 0.998           | 1.002           | 0.923          |
| Health Insurance Average       | 1         | 1               | 1               | 0.867          |
| Neighborhood Deprivation       | 1.023     | 0.932           | 1.124           | 0.628          |
| Unemployment Rate              | 0.99      | 0.949           | 1.033           | 0.636          |
| Smoking Products Spending      | 1.001     | 0.999           | 1.002           | 0.358          |
| Visited Doctor Last 12 months  | 1.001     | 1.001           | 1.001           | 0.001          |
| Public Transportation Spending | 1.001     | 0.999           | 1.002           | 0.341          |
